# Supplementary material
Source: publisher figshare collection journal article supplement (https://acs.figshare.com/ndownloader/files/8730025)
Supplement: Supplementary file 1 [file 8730025]

# Supplementary Information for

## On the Mechanism of the Iodide-Triiodide Exchange Reaction in a Solid-State Ionic Liquid

Joás Grossi,<sup>1,2</sup> Jorge J. Kohanoff,<sup>2,\*,a)</sup> Niall J. English,<sup>3</sup> Eduardo M. Bringa<sup>1</sup> and Mario G. Del Pópulo<sup>1,2,\*,b)</sup>

<sup>1</sup>CONICET & Facultad de Ciencias Exactas y Naturales, Universidad Nacional de Cuyo, Mendoza, Argentina.

<sup>2</sup>Atomistic Simulation Centre, School of Mathematics and Physics, Queen's University Belfast, University Road, Belfast BT7 1NN, Northern Ireland.

<sup>3</sup>School of Chemical and Bioprocess Engineering, University College Dublin, Belfield, Dublin 4, Ireland.

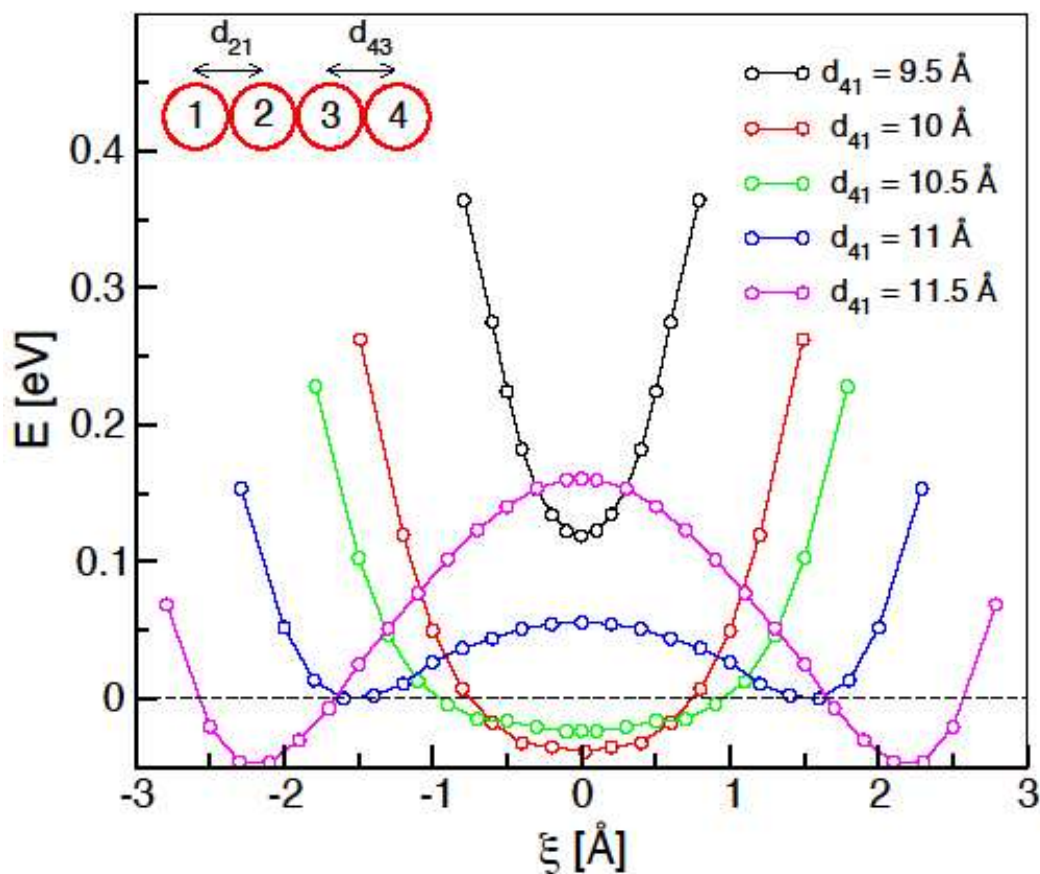

Fig. S1: Gas-phase study of the system potential energy as a function of  $\xi$ , for various  $d_{41}$  separations, via DFT single-point calculations. A collinear arrangement is adopted

Corresponding authors. Email: <sup>a)</sup> j.kohanoff@qub.ac.uk, <sup>b)</sup> m.del-populo@qub.ac.uk

for ‘head-on’ approach of 1 and departure of 4. For  $d_{41}$  is less than, or up to,  $\sim 10.5$  Å, a single energy minimum is evident for  $\xi = 0$  (*i.e.*,  $d_{43} = d_{21}$ ), associated with the formation of a symmetric  $I_4^{2-}$ . Once  $d_{41}$  exceeds  $\sim 10.5$  Å, two minima develop, for  $I^- \cdots I_3^-$  and  $I_3^- \cdots I^-$  (the approach of  $I^-$  1 and departure of  $I^-$  4, respectively).

Files labelled as **configure\_x.pdb** contain the configurations used as initial/final state in the five concatenated NEB calculations of Figure 2.

Files labelled as **Reorientation\_x.pdb** or **Exchange\_x.pdb** contain the full set of atomic coordinates for each of the five NEB windows of Figure 2.
